# Supplementary material
Source: PubMed Central journal article supplement (PMC8256450)
Supplement: NIHMS1063788-supplement-Supp_Tables.pdf [file NIHMS1063788-supplement-Supp_Tables.pdf]

Table 1. Summary Statistics for Non-Hispanic white Individuals used in analysis from COPDGene

| <b>Variable</b>                    | <b>Value</b>  |
|------------------------------------|---------------|
| n                                  | 6678          |
| Final Gold (%)                     |               |
|                                    | 0 2534 (37.9) |
|                                    | 1 607 (9.1)   |
|                                    | 2 1424 (21.3) |
|                                    | 3 909 (13.6)  |
|                                    | 4 487 (7.3)   |
|                                    | -1 698 (10.5) |
| NA                                 | 19 (0.3)      |
| Gender                             |               |
| Male (%)                           | 3180 (47.6)   |
| ATS Pack Years (mean (sd))         | 47.27 (26.02) |
| Height CM (mean (sd))              | 169.72 (9.46) |
| Age Enroll (mean (sd))             | 62.09 (8.84)  |
| FEV1 (mean (sd))                   | 2.18 (1.12)   |
| FVC (mean (sd))                    | 3.34 (1.22)   |
| FEV1 FVC ratio (mean (sd))         | 0.61 (0.54)   |
| FEV1 Percent Predicted (mean (sd)) | 73.30 (26.29) |

Table 2. UK Biobank Baseline Characteristics

| Variable                | Value            |
|-------------------------|------------------|
| n                       | 185565           |
| age (mean (SD))         | 56.50 (8.06)     |
| age2 (mean (SD))        | 3256.89 (892.71) |
| bmi (mean (SD))         | 27.12 (4.58)     |
| Average SBP (mean (SD)) | 137.21 (18.46)   |
| Average DBP (mean (SD)) | 81.84 (10.05)    |
| Sex = male (%)          | 85125 ( 45.9)    |
| hypertension (%)        |                  |
|                         | 0 30822 ( 16.6)  |
|                         | 1 25242 ( 13.6)  |
|                         | 2 50461 ( 27.2)  |
|                         | 3 75286 ( 40.6)  |
|                         | 4 3754 ( 2.0)    |

Table 3. Results of OrdinalGWAS on UK Biobank data for hypertension variable for pvalue &lt;= 1e-8

| chr | pos       | snpid       | maf         | hwepval     | effect size (OR) | pval     | loci           |
|-----|-----------|-------------|-------------|-------------|------------------|----------|----------------|
| 1   | 3328659   | rs2493292   | 0.1388011   | 0.257734702 | -0.0535559       | 1.50E-09 | PRDM16         |
| 1   | 3330884   | rs2493288   | 0.136696791 | 0.119333083 | -0.0524299       | 4.38E-09 | PRDM16         |
| 1   | 11834709  | rs72638696  | 0.107304605 | 0.004191509 | 0.08347266       | 3.59E-17 | C1orf167       |
| 1   | 11835070  | rs113980419 | 0.108177526 | 0.600608631 | 0.08422268       | 1.19E-17 | C1orf167       |
| 1   | 11835556  | rs41275456  | 0.108078744 | 0.710947962 | 0.08237138       | 5.88E-17 | C1orf167       |
| 1   | 11854476  | rs1801131   | 0.312986578 | 0.73322249  | 0.06461639       | 9.54E-23 | MTHFR          |
| 1   | 11859636  | rs74683406  | 0.056506275 | 0.871246314 | 0.10685977       | 6.24E-16 | MTHFR          |
| 1   | 11862778  | rs17367504  | 0.163977132 | 0.275304838 | 0.1006982        | 3.94E-34 | MTHFR          |
| 1   | 11863057  | rs2066470   | 0.107444187 | 0.477940696 | 0.08401135       | 1.78E-17 | MTHFR          |
| 1   | 11869230  | rs4846054   | 0.403583899 | 0.763474415 | 0.04873546       | 5.76E-15 | CLCN6          |
| 1   | 11895667  | rs74053327  | 0.056210768 | 0.898537694 | 0.10474914       | 2.52E-15 | CLCN6          |
| 1   | 11899033  | rs1023252   | 0.267754774 | 0.980067585 | 0.04612395       | 2.20E-11 | CLCN6          |
| 1   | 11913757  | rs198375    | 0.397594335 | 0.342071491 | 0.05889991       | 4.82E-21 | No gene listed |
| 1   | 11927825  | rs34241762  | 0.108856917 | 0.980144888 | 0.06542388       | 2.72E-11 | No gene listed |
| 1   | 11973523  | rs34550591  | 0.04966722  | 0.12107713  | 0.09427968       | 2.15E-11 | No gene listed |
| 2   | 26932031  | rs2586886   | 0.386963941 | 0.278137157 | -0.037121        | 3.56E-09 | KCNK3          |
| 2   | 26932887  | rs1275922   | 0.251821469 | 0.529365311 | -0.0408771       | 6.48E-09 | KCNK3          |
| 2   | 164915208 | rs13002573  | 0.237836694 | 4.18E-05    | 0.04239325       | 4.43E-09 | No gene listed |
| 2   | 164950456 | rs2675149   | 0.429425263 | 0.963937064 | 0.04366255       | 1.61E-12 | No gene listed |
| 2   | 164999883 | rs1374264   | 0.450608059 | 0.627890351 | 0.0500508        | 3.76E-16 | No gene listed |
| 2   | 165070207 | rs1898841   | 0.273982114 | 0.271347804 | 0.05697489       | 1.02E-16 | No gene listed |
| 2   | 165129299 | rs1561468   | 0.457932198 | 0.605022238 | 0.04419799       | 6.29E-13 | No gene listed |
| 4   | 81158221  | rs17004846  | 0.356381052 | 0.185873037 | -0.0553362       | 4.00E-18 | No gene listed |
| 4   | 81184341  | rs16998073  | 0.291168659 | 0.784186985 | -0.0773208       | 1.79E-30 | No gene listed |
| 4   | 81205868  | rs7681907   | 0.41430507  | 0.766975322 | -0.0379548       | 9.93E-10 | FGF5           |
| 4   | 102926923 | rs34592089  | 0.062265913 | 0.044965611 | 0.07719143       | 1.02E-09 | BANK1          |
| 4   | 103188709 | rs13107325  | 0.075552799 | 0.093654571 | 0.07963385       | 5.38E-12 | SLC39A8        |
| 4   | 156393641 | rs4690974   | 0.469562044 | 0.644999868 | -0.0365988       | 2.47E-09 | No gene listed |
| 5   | 32688090  | rs10755252  | 0.217489891 | 0.011287398 | 0.04541701       | 9.51E-10 | NPR3           |
| 5   | 32690199  | rs7715779   | 0.366150072 | 0.841520117 | 0.05606038       | 1.09E-18 | NPR3           |
| 5   | 32789852  | rs1173756   | 0.470696534 | 0.530800486 | 0.04889013       | 1.26E-15 | NPR3           |
| 5   | 32815028  | rs1173771   | 0.400677128 | 0.611805305 | 0.06280432       | 7.93E-24 | No gene listed |
| 5   | 32830521  | rs1173727   | 0.403825048 | 0.338481364 | 0.0632106        | 4.10E-24 | No gene listed |

|    |           |            |             |             |            |          |                |
|----|-----------|------------|-------------|-------------|------------|----------|----------------|
| 6  | 31253878  | rs2853935  | 0.426192712 | 0.662922017 | 0.03752123 | 3.82E-09 | No gene listed |
| 6  | 31254088  | rs2853933  | 0.426035599 | 0.79962329  | 0.03665377 | 8.65E-09 | No gene listed |
| 6  | 31259579  | rs2524163  | 0.426594591 | 0.86832754  | 0.03726089 | 4.96E-09 | No gene listed |
| 6  | 31260397  | rs2524156  | 0.425475535 | 0.153947073 | 0.03790826 | 3.18E-09 | No gene listed |
| 6  | 31261276  | rs2243868  | 0.425790097 | 0.596913113 | 0.03672202 | 8.72E-09 | LINC02571      |
| 6  | 31266117  | rs2524095  | 0.432209762 | 8.34E-39    | 0.03838402 | 1.01E-09 | LINC02571      |
| 6  | 31266522  | rs2524089  | 0.425181368 | 0.863895992 | 0.03770915 | 3.43E-09 | LINC02571      |
| 6  | 31269154  | rs2524066  | 0.426357008 | 0.60847137  | 0.03823433 | 1.95E-09 | LINC02571      |
| 6  | 31430799  | rs2596473  | 0.471069987 | 0.559576552 | -0.0382034 | 8.45E-10 | HCP5           |
| 6  | 31432125  | rs2284178  | 0.470935947 | 0.911559691 | -0.0381165 | 9.07E-10 | HCP5           |
| 6  | 31605199  | rs2736155  | 0.473989457 | 0.000213252 | -0.0360603 | 6.06E-09 | PRRC2A         |
| 6  | 31610529  | rs1077393  | 0.47597034  | 0.978964004 | -0.0361842 | 4.35E-09 | BAG6           |
| 6  | 31610686  | rs1052486  | 0.47651212  | 0.109356676 | -0.0373984 | 1.46E-09 | BAG6           |
| 6  | 31688518  | rs805293   | 0.45277075  | 0.971841306 | -0.0433015 | 2.61E-12 | MPIG6B         |
| 6  | 31837250  | rs660594   | 0.473319737 | 0.898542353 | 0.03772237 | 1.18E-09 | SLC44A4        |
| 6  | 31837277  | rs660550   | 0.473724371 | 0.852421162 | 0.0380239  | 8.44E-10 | SLC44A4        |
| 6  | 31837963  | rs577272   | 0.473917599 | 0.550488658 | 0.03764648 | 1.24E-09 | SLC44A4        |
| 6  | 31838441  | rs644827   | 0.473914263 | 0.815339091 | 0.03769961 | 1.17E-09 | SLC44A4        |
| 6  | 31838490  | rs644774   | 0.474158952 | 0.879887991 | 0.0379615  | 9.04E-10 | SLC44A4        |
| 6  | 31839309  | rs2242665  | 0.474433474 | 0.945389219 | 0.03797536 | 8.98E-10 | SLC44A4        |
| 6  | 31839494  | rs3132442  | 0.491356379 | 0.598875858 | 0.03935719 | 2.04E-10 | SLC44A4        |
| 6  | 31839782  | rs3130482  | 0.492118655 | 0.578597351 | 0.03993774 | 1.10E-10 | SLC44A4        |
| 6  | 127108920 | rs2021708  | 0.433261185 | 0.183908062 | -0.0481141 | 7.30E-15 | No gene listed |
| 6  | 127116727 | rs35211576 | 0.491028828 | 0.229270646 | -0.036589  | 2.50E-09 | No gene listed |
| 6  | 127141068 | rs35772466 | 0.490277755 | 0.746569264 | -0.0354798 | 6.89E-09 | No gene listed |
| 6  | 127147704 | rs9375459  | 0.43268461  | 0.215450123 | -0.0483083 | 6.16E-15 | No gene listed |
| 6  | 127177719 | rs11754682 | 0.433624303 | 0.196035793 | -0.04883   | 2.98E-15 | No gene listed |
| 6  | 127181089 | rs1361831  | 0.433220352 | 0.469099373 | -0.0483717 | 5.00E-15 | No gene listed |
| 6  | 127227414 | rs2068408  | 0.382348319 | 0.381515938 | -0.041335  | 5.90E-11 | LOC105377989   |
| 7  | 27220831  | rs6461992  | 0.073784122 | 0.555620596 | 0.06762078 | 6.89E-09 | HOXA10         |
| 7  | 106409452 | rs17398575 | 0.239666568 | 0.866094626 | -0.0554819 | 9.52E-15 | No gene listed |
| 7  | 106414069 | rs2392929  | 0.197207316 | 0.526884612 | -0.0652155 | 2.09E-17 | No gene listed |
| 10 | 18711195  | rs11014171 | 0.335224941 | 0.033896959 | 0.05613511 | 5.41E-18 | CACNB2         |
| 10 | 18725053  | rs6482423  | 0.337082052 | 0.007943536 | 0.05832436 | 2.58E-19 | CACNB2         |
| 10 | 18727959  | rs12258967 | 0.299335758 | 0.154624029 | 0.06391272 | 1.26E-21 | CACNB2         |

|    |           |            |             |             |            |          |                |
|----|-----------|------------|-------------|-------------|------------|----------|----------------|
| 10 | 63467553  | rs4590817  | 0.172142583 | 0.75744419  | 0.05329626 | 4.61E-11 | CABCOCO1       |
| 10 | 63524591  | rs1530440  | 0.188884932 | 0.165006143 | 0.05447183 | 3.10E-12 | CABCOCO1       |
| 10 | 96039597  | rs2274224  | 0.433131602 | 0.340175948 | 0.04650402 | 4.59E-14 | PLCE1          |
| 10 | 104591393 | rs17115100 | 0.083450241 | 0.306931707 | 0.08954171 | 5.45E-16 | CYP17A1        |
| 10 | 104594507 | rs1004467  | 0.084522917 | 0.215475681 | 0.08905793 | 4.21E-16 | CYP17A1        |
| 10 | 104719096 | rs12413409 | 0.076911465 | 0.024483095 | 0.09777913 | 1.09E-17 | CNNM2          |
| 10 | 104846178 | rs11191548 | 0.07536728  | 0.002706961 | 0.10451634 | 1.14E-19 | CNNM2          |
| 10 | 104897901 | rs732998   | 0.076324493 | 0.129377247 | 0.10547556 | 3.82E-20 | NT5C2          |
| 10 | 104906211 | rs11191580 | 0.077281323 | 0.025414519 | 0.10523462 | 2.69E-20 | NT5C2          |
| 11 | 10259378  | rs4910109  | 0.49293838  | 0.699689073 | -0.0367044 | 2.08E-09 | SBF2           |
| 11 | 10268593  | rs56352102 | 0.18276811  | 0.260377108 | -0.0550159 | 3.32E-12 | SBF2           |
| 11 | 10350538  | rs7129220  | 0.116204806 | 0.418629672 | -0.0548072 | 8.80E-09 | CAND1.11       |
| 11 | 10357572  | rs2923089  | 0.47215034  | 0.838782378 | -0.0418692 | 8.71E-12 | CAND1.11       |
| 11 | 10370420  | rs1580004  | 0.487333427 | 0.902321278 | 0.03915954 | 1.66E-10 | CAND1.11       |
| 11 | 47276675  | rs11039149 | 0.27543907  | 0.371686036 | -0.0468791 | 8.07E-12 | NR1H3          |
| 11 | 47293799  | rs10501320 | 0.263079953 | 0.746673274 | -0.0458689 | 4.16E-11 | MADD           |
| 11 | 47346723  | rs11039182 | 0.275279596 | 0.441264741 | -0.0467261 | 9.44E-12 | MADD           |
| 11 | 47440758  | rs2293579  | 0.387322424 | 0.859441604 | -0.0453465 | 5.05E-13 | PSMC3          |
| 11 | 47474146  | rs12361415 | 0.2870175   | 0.336058015 | -0.0412052 | 1.16E-09 | No gene listed |
| 11 | 47500267  | rs2242081  | 0.445944706 | 0.948742127 | -0.03939   | 1.58E-10 | CELF1          |
| 11 | 47662932  | rs7120548  | 0.300546522 | 0.581700506 | -0.0448821 | 1.73E-11 | MTCH2          |
| 11 | 47701528  | rs12286721 | 0.449115619 | 0.06616798  | -0.0381094 | 6.66E-10 | AGBL2          |
| 11 | 47857253  | rs3816605  | 0.453724404 | 0.377859376 | -0.037463  | 1.14E-09 | NUP160         |
| 11 | 47901269  | rs1872167  | 0.140817912 | 0.57246681  | 0.05387594 | 8.51E-10 | No gene listed |
| 11 | 48115089  | rs3942852  | 0.211680919 | 0.387447926 | 0.04496659 | 1.85E-09 | PTPRJ          |
| 11 | 48285906  | rs16905753 | 0.143761697 | 0.571804517 | 0.05041853 | 7.23E-09 | OR4X1          |
| 11 | 48382471  | rs1351696  | 0.143649822 | 0.497962995 | 0.05032647 | 7.90E-09 | No gene listed |
| 11 | 49258171  | rs663877   | 0.145153184 | 0.045667931 | 0.0503544  | 6.83E-09 | No gene listed |
| 11 | 49267146  | rs7924431  | 0.145234068 | 0.035457927 | 0.05045032 | 6.79E-09 | No gene listed |
| 11 | 88741660  | rs5016282  | 0.146599708 | 0.067616101 | 0.05169951 | 2.61E-09 | GRM5           |
| 11 | 100499866 | rs7932851  | 0.458277705 | 0.288657156 | -0.0354299 | 8.11E-09 | No gene listed |
| 11 | 100533021 | rs10895001 | 0.280158015 | 0.097527543 | 0.06575096 | 4.76E-22 | No gene listed |
| 11 | 100559527 | rs77802037 | 0.035423374 | 0.140056873 | 0.11076346 | 2.03E-11 | ARHGAP42       |
| 11 | 100692566 | rs35473622 | 0.249676006 | 0.410532749 | 0.05736285 | 5.60E-16 | ARHGAP42       |
| 12 | 90008959  | rs2681472  | 0.170884028 | 0.009319801 | 0.06369288 | 5.03E-15 | ATP2B1         |

|    |           |            |             |             |            |          |                |
|----|-----------|------------|-------------|-------------|------------|----------|----------------|
| 12 | 90013089  | rs2681492  | 0.170794817 | 0.000617332 | 0.06472751 | 1.96E-15 | ATP2B1         |
| 12 | 90060586  | rs17249754 | 0.170673064 | 0.001892279 | 0.06306934 | 1.02E-14 | ATP2B1         |
| 12 | 90081188  | rs7136259  | 0.417892726 | 0.212307485 | 0.03928554 | 2.36E-10 | ATP2B1         |
| 12 | 111792427 | rs10849937 | 0.203266714 | 0.75551282  | 0.05191228 | 7.49E-12 | No gene listed |
| 12 | 111833348 | rs10774622 | 0.212975703 | 0.307507964 | 0.0492524  | 3.85E-11 | LINC02356      |
| 12 | 111884608 | rs3184504  | 0.480660584 | 0.363939174 | -0.044282  | 4.95E-13 | SH2B3          |
| 12 | 111910219 | rs10774625 | 0.494067444 | 0.203636918 | -0.0449492 | 2.21E-13 | ATXN2          |
| 12 | 112007756 | rs653178   | 0.480832938 | 0.335096741 | -0.0432376 | 1.71E-12 | ATXN2          |
| 14 | 23409909  | rs35085068 | 0.428217755 | 0.151779839 | -0.036399  | 3.99E-09 | LOC101926933   |
| 15 | 74716609  | rs8036030  | 0.377657852 | 0.315766528 | -0.041086  | 7.66E-11 | SEMA7A         |
| 15 | 75033400  | rs2472299  | 0.270065649 | 0.151606118 | -0.0522844 | 3.54E-14 | No gene listed |
| 15 | 75041917  | rs762551   | 0.270185783 | 0.095203004 | -0.0527077 | 2.24E-14 | CYP1A2         |
| 15 | 75044238  | rs2472304  | 0.328362355 | 0.189518114 | -0.0439261 | 1.65E-11 | CYP1A2         |
| 15 | 75047426  | rs2470890  | 0.328383684 | 0.172934159 | -0.0444173 | 9.72E-12 | CYP1A2         |
| 15 | 75069282  | rs936226   | 0.257517047 | 0.082544433 | -0.0544424 | 9.31E-15 | No gene listed |
| 15 | 75077367  | rs1378942  | 0.318229383 | 0.188888425 | -0.0451228 | 6.63E-12 | CSK            |
| 15 | 75101530  | rs34862454 | 0.326067681 | 0.010883177 | -0.0433474 | 3.64E-11 | No gene listed |
| 15 | 75131661  | rs4886615  | 0.271892111 | 0.260505562 | -0.0494105 | 6.92E-13 | ULK3           |
| 15 | 75136261  | rs6938     | 0.296117427 | 0.006583163 | -0.0458946 | 9.68E-12 | SCAMP2         |
| 15 | 75194490  | rs6495127  | 0.284755953 | 0.461365907 | -0.0419321 | 6.21E-10 | FAM219B        |
| 15 | 91404705  | rs4932370  | 0.336191438 | 0.560249818 | -0.049114  | 3.39E-14 | No gene listed |
| 15 | 91426560  | rs4702     | 0.443534204 | 0.525283772 | 0.04028794 | 5.52E-11 | FES            |
| 15 | 91428521  | rs11330240 | 0.327030298 | 0.737000172 | -0.056264  | 7.26E-18 | FES            |
| 15 | 91429176  | rs7497304  | 0.325763994 | 0.549389534 | -0.0572501 | 1.74E-18 | FES            |
| 15 | 91441673  | rs2677738  | 0.352598639 | 0.000976581 | 0.05067651 | 3.17E-15 | No gene listed |
| 16 | 75313485  | rs4888372  | 0.410807383 | 0.495330339 | 0.03632925 | 5.16E-09 | LOC105371345   |
| 16 | 75388731  | rs8050059  | 0.404542532 | 0.204580477 | 0.03615101 | 6.97E-09 | CFDP1          |
| 17 | 43131480  | rs4793172  | 0.370529324 | 0.492327736 | -0.0496783 | 4.69E-15 | DCAKD          |
| 17 | 43136303  | rs55897749 | 0.370970963 | 0.529653667 | -0.0488207 | 1.31E-14 | DCAKD          |
| 17 | 43141634  | rs6503415  | 0.449655262 | 0.178786587 | -0.0434051 | 1.85E-12 | NMT1           |
| 17 | 43165185  | rs2239916  | 0.416180577 | 0.049798073 | -0.0503859 | 6.16E-16 | NMT1           |
| 17 | 43183108  | rs1053739  | 0.347046089 | 0.066199423 | -0.0543273 | 3.38E-17 | NMT1           |
| 17 | 43195981  | rs3744760  | 0.267629995 | 0.394079019 | -0.0609742 | 1.30E-18 | PLCD3          |
| 17 | 43208121  | rs12946454 | 0.268051966 | 0.676994002 | -0.0519641 | 5.74E-14 | ACBD4          |
| 17 | 43216281  | rs4986172  | 0.338903231 | 0.325170223 | -0.0434869 | 1.81E-11 | ACBD4          |

|    |          |             |             |             |            |          |                |
|----|----------|-------------|-------------|-------------|------------|----------|----------------|
| 17 | 43226887 | rs12051846  | 0.253132575 | 0.564509061 | -0.0483902 | 6.45E-12 | HEXIM1         |
| 17 | 43227214 | rs1044977   | 0.253416186 | 0.757271482 | -0.0475819 | 1.41E-11 | HEXIM1         |
| 17 | 46666483 | rs117470167 | 0.04120212  | 0.334208144 | 0.09233599 | 1.60E-09 | HOXB3          |
| 19 | 7252756  | rs4247374   | 0.142088459 | 0.759310819 | 0.06242757 | 9.88E-13 | INSR           |
| 19 | 7253184  | rs34328549  | 0.122118871 | 0.269521271 | 0.07281571 | 4.79E-15 | INSR           |
| 19 | 11526765 | rs167479    | 0.472352928 | 0.470953034 | 0.04913276 | 8.35E-16 | RGL3           |
| 20 | 10969030 | rs1327235   | 0.476736403 | 0.266674151 | -0.0426419 | 3.45E-12 | No gene listed |
| 20 | 57698020 | rs1465537   | 0.129338604 | 0.015234315 | -0.0581386 | 2.13E-10 | No gene listed |
| 20 | 57702611 | rs236720    | 0.120903376 | 0.02339369  | -0.0646425 | 6.48E-12 | No gene listed |
| 20 | 57758720 | rs16982520  | 0.120375067 | 0.021209887 | -0.0736275 | 5.99E-15 | ZNF831         |

Table 4. Results of Sex\*Snps OrdinalGWAS on UK Biobank data for hypertension variable for SNPs that had pvalue <= 1e-8 in original GWAS.

| chr | pos       | snpid       | maf         | hwepval     | snpeffectnull | snpeffectfull | GxEeffect    | pval        | loci           |
|-----|-----------|-------------|-------------|-------------|---------------|---------------|--------------|-------------|----------------|
| 1   | 3328659   | rs2493292   | 0.1388011   | 0.257734702 | -0.053555931  | -0.052934951  | -0.001315046 | 0.905686897 | PRDM16         |
| 1   | 3330884   | rs2493288   | 0.136696791 | 0.119333083 | -0.052429877  | -0.04995382   | -0.005456952 | 0.757022228 | PRDM16         |
| 1   | 11834709  | rs72638696  | 0.107304605 | 0.004191509 | 0.083472662   | 0.095714068   | -0.02713332  | 0.17133243  | C1orf167       |
| 1   | 11835070  | rs113980419 | 0.108177526 | 0.600608631 | 0.084222682   | 0.094294039   | -0.022405086 | 0.257369253 | C1orf167       |
| 1   | 11835556  | rs41275456  | 0.108078744 | 0.710947962 | 0.082371385   | 0.093114371   | -0.02378139  | 0.22534915  | C1orf167       |
| 1   | 11854476  | rs1801131   | 0.312986578 | 0.73322249  | 0.064616389   | 0.067609285   | -0.006519977 | 0.645738518 | MTHFR          |
| 1   | 11859636  | rs74683406  | 0.056506275 | 0.871246314 | 0.106859774   | 0.106956262   | 4.72E-05     | 1           | MTHFR          |
| 1   | 11862778  | rs17367504  | 0.163977132 | 0.275304838 | 0.100698199   | 0.108869863   | -0.018055714 | 0.27780763  | MTHFR          |
| 1   | 11863057  | rs2066470   | 0.107444187 | 0.477940696 | 0.084011354   | 0.0956832     | -0.025872266 | 0.191314623 | MTHFR          |
| 1   | 11869230  | rs4846054   | 0.403583899 | 0.763474415 | 0.048735456   | 0.048424076   | 0.000281895  | 1           | CLCN6          |
| 1   | 11895667  | rs74053327  | 0.056210768 | 0.898537694 | 0.104749137   | 0.108874176   | -0.008885777 | 0.733283531 | CLCN6          |
| 1   | 11899033  | rs1023252   | 0.267754774 | 0.980067585 | 0.046123954   | 0.05075529    | -0.010121065 | 0.464112166 | CLCN6          |
| 1   | 11913757  | rs198375    | 0.397594335 | 0.342071491 | 0.058899911   | 0.062671292   | -0.008328608 | 0.512946274 | No gene listed |
| 1   | 11927825  | rs34241762  | 0.108856917 | 0.980144888 | 0.065423876   | 0.07812984    | -0.027925168 | 0.156185196 | No gene listed |
| 1   | 11973523  | rs34550591  | 0.04966722  | 0.12107713  | 0.094279682   | 0.098520915   | -0.009358058 | 0.73957201  | No gene listed |
| 2   | 26932031  | rs2586886   | 0.386963941 | 0.278137157 | -0.037120977  | -0.042120765  | 0.011174331  | 0.375241447 | KCNK3          |
| 2   | 26932887  | rs1275922   | 0.251821469 | 0.529365311 | -0.040877107  | -0.047740624  | 0.014815888  | 0.304142353 | KCNK3          |
| 2   | 164915208 | rs13002573  | 0.237836694 | 4.18E-05    | 0.042393254   | 0.042997887   | -0.001414912 | 1           | No gene listed |
| 2   | 164950456 | rs2675149   | 0.429425263 | 0.963937064 | 0.043662549   | 0.05437284    | -0.023573752 | 0.056970528 | No gene listed |
| 2   | 164999883 | rs1374264   | 0.450608059 | 0.627890351 | 0.050050802   | 0.060968284   | -0.023954812 | 0.052262393 | No gene listed |
| 2   | 165070207 | rs1898841   | 0.273982114 | 0.271347804 | 0.056974894   | 0.063794899   | -0.015092206 | 0.272906464 | No gene listed |
| 2   | 165129299 | rs1561468   | 0.457932198 | 0.605022238 | 0.044197993   | 0.053560109   | -0.020468551 | 0.096277132 | No gene listed |
| 4   | 81158221  | rs17004846  | 0.356381052 | 0.185873037 | -0.055336229  | -0.069641948  | 0.031551115  | 0.013793189 | No gene listed |
| 4   | 81184341  | rs16998073  | 0.291168659 | 0.784186985 | -0.077320785  | -0.089021125  | 0.025980096  | 0.053729727 | No gene listed |
| 4   | 81205868  | rs7681907   | 0.41430507  | 0.766975322 | -0.037954779  | -0.048873586  | 0.024034744  | 0.054138134 | FGF5           |
| 4   | 102926923 | rs34592089  | 0.062265913 | 0.044965611 | 0.077191428   | 0.073192909   | 0.00873427   | 0.726244032 | BANK1          |
| 4   | 103188709 | rs13107325  | 0.075552799 | 0.093654571 | 0.079633845   | 0.086350906   | -0.014711064 | 0.560000547 | SLC39A8        |
| 4   | 156393641 | rs4690974   | 0.469562044 | 0.644999868 | -0.036598815  | -0.039935574  | 0.007545391  | 0.548310494 | No gene listed |
| 5   | 32688090  | rs10755252  | 0.217489891 | 0.011287398 | 0.045417005   | 0.060663064   | -0.033559304 | 0.024800901 | NPR3           |
| 5   | 32690199  | rs7715779   | 0.366150072 | 0.841520117 | 0.056060376   | 0.064329841   | -0.01824248  | 0.155687768 | NPR3           |
| 5   | 32789852  | rs1173756   | 0.470696534 | 0.530800486 | 0.048890129   | 0.055131254   | -0.013677893 | 0.260074757 | NPR3           |
| 5   | 32815028  | rs1173771   | 0.400677128 | 0.611805305 | 0.062804319   | 0.066257238   | -0.007905949 | 0.554509271 | No gene listed |
| 5   | 32830521  | rs1173727   | 0.403825048 | 0.338481364 | 0.063210602   | 0.067020663   | -0.008654623 | 0.492284835 | No gene listed |
| 6   | 31253878  | rs2853935   | 0.426192712 | 0.662922017 | 0.037521226   | 0.053320645   | -0.034805646 | 0.005099484 | No gene listed |
| 6   | 31254088  | rs2853933   | 0.426035599 | 0.79962329  | 0.036653773   | 0.052494022   | -0.034948567 | 0.004984711 | No gene listed |
| 6   | 31259579  | rs2524163   | 0.426594591 | 0.86832754  | 0.037260891   | 0.052757389   | -0.034336634 | 0.005934974 | No gene listed |
| 6   | 31260397  | rs2524156   | 0.425475535 | 0.153947073 | 0.037908256   | 0.053065974   | -0.033562277 | 0.007134382 | No gene listed |
| 6   | 31261276  | rs2243868   | 0.425790097 | 0.596913113 | 0.036722024   | 0.05222975    | -0.034244167 | 0.005868477 | LINC02571      |
| 6   | 31266117  | rs2524095   | 0.432209762 | 8.34E-39    | 0.038384017   | 0.053713652   | -0.034124539 | 0.005258649 | LINC02571      |
| 6   | 31266522  | rs2524089   | 0.425181368 | 0.863895992 | 0.037709154   | 0.05350303    | -0.034962295 | 0.004846167 | LINC02571      |
| 6   | 31269154  | rs2524066   | 0.426357008 | 0.60847137  | 0.038234326   | 0.053750468   | -0.034199666 | 0.005927251 | LINC02571      |
| 6   | 31430799  | rs2596473   | 0.471069987 | 0.559576552 | -0.038203438  | -0.048518613  | 0.022541315  | 0.067337943 | HCP5           |
| 6   | 31432125  | rs2284178   | 0.470935947 | 0.911559691 | -0.03811652   | -0.047694459  | 0.020995133  | 0.092627441 | HCP5           |
| 6   | 31605199  | rs2736155   | 0.473989457 | 0.000213252 | -0.036060268  | -0.036928825  | 0.002026111  | 0.874799601 | PRRC2A         |
| 6   | 31610529  | rs1077393   | 0.47597034  | 0.978964004 | -0.036184206  | -0.036545177  | 0.000828671  | 1           | BAG6           |
| 6   | 31610686  | rs1052486   | 0.47651212  | 0.109356676 | -0.03739841   | -0.03923546   | 0.004186015  | 0.741726198 | BAG6           |
| 6   | 31688518  | rs805293    | 0.45277075  | 0.971841306 | -0.043301535  | -0.048480993  | 0.01142491   | 0.373695966 | MPIG6B         |
| 6   | 31837250  | rs660594    | 0.473319737 | 0.898542353 | 0.037722369   | 0.043583964   | -0.012925227 | 0.286188481 | SLC44A4        |



|    |           |            |             |             |              |              |              |             |                |
|----|-----------|------------|-------------|-------------|--------------|--------------|--------------|-------------|----------------|
| 6  | 31837277  | rs660550   | 0.473724371 | 0.852421162 | 0.038023898  | 0.044168205  | -0.013584995 | 0.263198849 | SLC44A4        |
| 6  | 31837963  | rs577272   | 0.473917599 | 0.550488658 | 0.037646482  | 0.0439409    | -0.013848869 | 0.25387519  | SLC44A4        |
| 6  | 31838441  | rs644827   | 0.473914263 | 0.815339091 | 0.037699607  | 0.044056281  | -0.013984858 | 0.249201409 | SLC44A4        |
| 6  | 31838490  | rs644774   | 0.474158952 | 0.879887991 | 0.037961495  | 0.043948253  | -0.013241934 | 0.275254312 | SLC44A4        |
| 6  | 31839309  | rs2242665  | 0.474433474 | 0.945389219 | 0.037975364  | 0.044192803  | -0.013673385 | 0.259825538 | SLC44A4        |
| 6  | 31839494  | rs3132442  | 0.491356379 | 0.598875858 | 0.039357188  | 0.045318067  | -0.013095227 | 0.282934129 | SLC44A4        |
| 6  | 31839782  | rs3130482  | 0.492118655 | 0.578597351 | 0.039937742  | 0.046008331  | -0.013362597 | 0.273782409 | SLC44A4        |
| 6  | 127108920 | rs2021708  | 0.433261185 | 0.183908062 | -0.048114067 | -0.061033701 | 0.028446028  | 0.021923853 | No gene listed |
| 6  | 127116727 | rs35211576 | 0.491028828 | 0.229270646 | -0.036589007 | -0.047417387 | 0.023889409  | 0.052839964 | No gene listed |
| 6  | 127141068 | rs35772466 | 0.490277755 | 0.746569264 | -0.035479827 | -0.045954563 | 0.023020872  | 0.061375007 | No gene listed |
| 6  | 127147704 | rs9375459  | 0.43268461  | 0.215450123 | -0.048308283 | -0.060449001 | 0.026724434  | 0.031162515 | No gene listed |
| 6  | 127177719 | rs11754682 | 0.433624303 | 0.196035793 | -0.048830048 | -0.061862993 | 0.028728607  | 0.020425829 | No gene listed |
| 6  | 127181089 | rs1361831  | 0.433220352 | 0.469099373 | -0.04837169  | -0.061433899 | 0.028704454  | 0.020004273 | No gene listed |
| 6  | 127227414 | rs2068408  | 0.382348319 | 0.381515938 | -0.041334988 | -0.051421809 | 0.022280122  | 0.079141425 | LOC105377989   |
| 7  | 27220831  | rs6461992  | 0.073784122 | 0.555620596 | 0.067620783  | 0.079909877  | -0.027210983 | 0.256976848 | HOXA10         |
| 7  | 106409452 | rs17398575 | 0.239666568 | 0.866094626 | -0.055481866 | -0.061048668 | 0.01227703   | 0.392563755 | No gene listed |
| 7  | 106414069 | rs2392929  | 0.197207316 | 0.526884612 | -0.065215483 | -0.075428699 | 0.022458558  | 0.145227699 | No gene listed |
| 10 | 18711195  | rs11014171 | 0.335224941 | 0.033896959 | 0.056135111  | 0.053069841  | 0.006821782  | 0.614800207 | CACNB2         |
| 10 | 18725053  | rs6482423  | 0.337082052 | 0.007943536 | 0.058324357  | 0.052645805  | 0.012776915  | 0.334085467 | CACNB2         |
| 10 | 18727959  | rs12258967 | 0.299335758 | 0.154624029 | 0.063912719  | 0.056510536  | 0.016396913  | 0.231911092 | CACNB2         |
| 10 | 63467553  | rs4590817  | 0.172142583 | 0.75744419  | 0.053296255  | 0.06755773   | -0.031331052 | 0.052509885 | CABCOC01       |
| 10 | 63524591  | rs1530440  | 0.188884932 | 0.165006143 | 0.054471827  | 0.061331283  | -0.015145782 | 0.335953849 | CABCOC01       |
| 10 | 96039597  | rs2274224  | 0.433131602 | 0.340175948 | 0.046504018  | 0.043806107  | 0.006140856  | 0.580979791 | PLCE1          |
| 10 | 104591393 | rs17115100 | 0.083450241 | 0.306931707 | 0.089541712  | 0.122168703  | -0.071085231 | 0.001334988 | CYP17A1        |
| 10 | 104594507 | rs1004467  | 0.084522917 | 0.215475681 | 0.089057931  | 0.121652257  | -0.070844131 | 0.001247915 | CYP17A1        |
| 10 | 104719096 | rs12413409 | 0.076911465 | 0.024483095 | 0.097779132  | 0.133404517  | -0.078028029 | 0.000655432 | CNNM2          |
| 10 | 104846178 | rs11191548 | 0.07536728  | 0.002706961 | 0.104516336  | 0.139918178  | -0.077439543 | 0.000769287 | CNNM2          |
| 10 | 104897901 | rs732998   | 0.076324493 | 0.129377247 | 0.105475555  | 0.142382331  | -0.080757412 | 0.000441177 | NT5C2          |
| 10 | 104906211 | rs11191580 | 0.077281323 | 0.025414519 | 0.105234619  | 0.141801297  | -0.080100183 | 0.000466921 | NT5C2          |
| 11 | 10259378  | rs4910109  | 0.49293838  | 0.699689073 | -0.036704359 | -0.032285741 | -0.00965664  | 0.433904893 | SBF2           |
| 11 | 10268593  | rs56352102 | 0.18276811  | 0.260377108 | -0.055015864 | -0.056653627 | 0.003574962  | 0.823398638 | SBF2           |
| 11 | 10350538  | rs7129220  | 0.116204806 | 0.418629672 | -0.054807222 | -0.05243735  | -0.005190457 | 0.752839494 | CAND1.11       |
| 11 | 10357572  | rs2923089  | 0.47215034  | 0.838782378 | -0.041869206 | -0.040982886 | -0.00190417  | 0.96028543  | CAND1.11       |
| 11 | 10370420  | rs1580004  | 0.487333427 | 0.902321278 | 0.039159541  | 0.037099109  | 0.004582513  | 0.720088307 | CAND1.11       |
| 11 | 47276675  | rs11039149 | 0.27543907  | 0.371686036 | -0.046879075 | -0.060470938 | 0.030004746  | 0.029189541 | NR1H3          |
| 11 | 47293799  | rs10501320 | 0.263079953 | 0.746673274 | -0.045868866 | -0.06162082  | 0.034604428  | 0.01280941  | MADD           |
| 11 | 47346723  | rs11039182 | 0.275279596 | 0.441264741 | -0.046726128 | -0.061046806 | 0.032106715  | 0.020013807 | MADD           |
| 11 | 47440758  | rs2293579  | 0.387322424 | 0.859441604 | -0.045346525 | -0.052567773 | 0.015883316  | 0.216921641 | PSMC3          |
| 11 | 47474146  | rs12361415 | 0.2870175   | 0.336058015 | -0.041205193 | -0.047124303 | 0.01295581   | 0.338674704 | No gene listed |
| 11 | 47500267  | rs2242081  | 0.445944706 | 0.948742127 | -0.039390022 | -0.04222089  | 0.006249153  | 0.609671993 | CELF1          |
| 11 | 47662932  | rs7120548  | 0.300546522 | 0.581700506 | -0.044882137 | -0.054719082 | 0.021625299  | 0.10609868  | MTCH2          |
| 11 | 47701528  | rs12286721 | 0.449115619 | 0.06616798  | -0.038109433 | -0.040056496 | 0.004305539  | 0.731399101 | AGBL2          |
| 11 | 47857253  | rs3816605  | 0.453724404 | 0.377859376 | -0.037463047 | -0.039687644 | 0.004879985  | 0.713015678 | NUP160         |
| 11 | 47901269  | rs1872167  | 0.140817912 | 0.57246681  | 0.053875938  | 0.06038592   | -0.014418396 | 0.414621348 | No gene listed |
| 11 | 48115089  | rs3942852  | 0.211680919 | 0.387447926 | 0.044966585  | 0.052667758  | -0.017078836 | 0.255757853 | PTPRJ          |
| 11 | 48285906  | rs16905753 | 0.143761697 | 0.571804517 | 0.050418526  | 0.056129932  | -0.012565222 | 0.46869684  | OR4X1          |
| 11 | 48382471  | rs1351696  | 0.143649822 | 0.497962995 | 0.050326474  | 0.05555666   | -0.011490793 | 0.500112451 | No gene listed |
| 11 | 49258171  | rs663877   | 0.145153184 | 0.045667931 | 0.050354403  | 0.054291478  | -0.00846372  | 0.622018785 | No gene listed |
| 11 | 49267146  | rs7924431  | 0.145234068 | 0.035457927 | 0.050450325  | 0.056456463  | -0.013237006 | 0.435078767 | No gene listed |
| 11 | 88741660  | rs5016282  | 0.146599708 | 0.067616101 | 0.051699508  | 0.057008022  | -0.011718705 | 0.472604283 | GRM5           |

|    |           |             |             |             |              |              |              |             |                |
|----|-----------|-------------|-------------|-------------|--------------|--------------|--------------|-------------|----------------|
| 11 | 100499866 | rs7932851   | 0.458277705 | 0.288657156 | -0.035429869 | -0.038589346 | 0.006997792  | 0.575518971 | No gene listed |
| 11 | 100533021 | rs10895001  | 0.280158015 | 0.097527543 | 0.065750963  | 0.070712879  | -0.011116959 | 0.439408847 | No gene listed |
| 11 | 100559527 | rs77802037  | 0.035423374 | 0.140056873 | 0.110763464  | 0.145232259  | -0.075573773 | 0.023424576 | ARHGAP42       |
| 11 | 100692566 | rs35473622  | 0.249676006 | 0.410532749 | 0.057362852  | 0.061769377  | -0.009715035 | 0.494398486 | ARHGAP42       |
| 12 | 90008959  | rs2681472   | 0.170884028 | 0.009319801 | 0.063692877  | 0.075524603  | -0.025985041 | 0.111770893 | ATP2B1         |
| 12 | 90013089  | rs2681492   | 0.170794817 | 0.000617332 | 0.06472751   | 0.077202521  | -0.027328199 | 0.094486236 | ATP2B1         |
| 12 | 90060586  | rs17249754  | 0.170673064 | 0.001892279 | 0.063069336  | 0.075499334  | -0.027257357 | 0.09567721  | ATP2B1         |
| 12 | 90081188  | rs7136259   | 0.417892726 | 0.212307485 | 0.039285538  | 0.056947407  | -0.038604507 | 0.001943759 | ATP2B1         |
| 12 | 111792427 | rs10849937  | 0.203266714 | 0.75551282  | 0.051912277  | 0.061906059  | -0.022215203 | 0.14580756  | No gene listed |
| 12 | 111833348 | rs10774622  | 0.212975703 | 0.307507964 | 0.049252405  | 0.050264296  | -0.002263439 | 0.906429516 | LINC02356      |
| 12 | 111884608 | rs3184504   | 0.480660584 | 0.363939174 | -0.044282026 | -0.058210411 | 0.03078648   | 0.012362229 | SH2B3          |
| 12 | 111910219 | rs10774625  | 0.494067444 | 0.203636918 | -0.044949189 | -0.058355383 | 0.02960162   | 0.016128114 | ATXN2          |
| 12 | 112007756 | rs653178    | 0.480832938 | 0.335096741 | -0.043237556 | -0.057267912 | 0.03102536   | 0.011696114 | ATXN2          |
| 14 | 23409909  | rs35085068  | 0.428217755 | 0.151779839 | -0.036398976 | -0.02499227  | -0.02548188  | 0.042453988 | LOC101926933   |
| 15 | 74716609  | rs8036030   | 0.377657852 | 0.315766528 | -0.041085993 | -0.045072935 | 0.00888955   | 0.529992412 | SEMA7A         |
| 15 | 75033400  | rs2472299   | 0.270065649 | 0.151606118 | -0.052284417 | -0.063952444 | 0.025798217  | 0.06230996  | No gene listed |
| 15 | 75041917  | rs762551    | 0.270185783 | 0.095203004 | -0.052707652 | -0.064235779 | 0.025446169  | 0.065829361 | CYP1A2         |
| 15 | 75044238  | rs2472304   | 0.328362355 | 0.189518114 | -0.04392608  | -0.054631558 | 0.023574241  | 0.071310126 | CYP1A2         |
| 15 | 75047426  | rs2470890   | 0.328383684 | 0.172934159 | -0.044417254 | -0.055669893 | 0.0248407    | 0.057870174 | CYP1A2         |
| 15 | 75069282  | rs936226    | 0.257517047 | 0.082544433 | -0.05442378  | -0.066704713 | 0.026961141  | 0.053710736 | No gene listed |
| 15 | 75077367  | rs1378942   | 0.318229383 | 0.188888425 | -0.045122804 | -0.05496803  | 0.021688661  | 0.10011643  | CSK            |
| 15 | 75101530  | rs34862454  | 0.326067681 | 0.010883177 | -0.04334736  | -0.053434236 | 0.022222809  | 0.091163336 | No gene listed |
| 15 | 75131661  | rs4886615   | 0.271892111 | 0.260505562 | -0.049410523 | -0.061949457 | 0.027622606  | 0.045524462 | ULK3           |
| 15 | 75136261  | rs6938      | 0.296117427 | 0.006583163 | -0.045894637 | -0.057465342 | 0.025482906  | 0.05865969  | SCAMP2         |
| 15 | 75194490  | rs6495127   | 0.284755953 | 0.461365907 | -0.041932101 | -0.051170447 | 0.0202535    | 0.136981899 | FAM219B        |
| 15 | 91404705  | rs4932370   | 0.336191438 | 0.560249818 | -0.049113968 | -0.050271487 | 0.00272019   | 0.870034858 | No gene listed |
| 15 | 91426560  | rs4702      | 0.443534204 | 0.525283772 | 0.040287944  | 0.043231974  | -0.006358811 | 0.583727148 | FES            |
| 15 | 91428521  | rs11330240  | 0.327030298 | 0.737000172 | -0.056264033 | -0.061267655 | 0.011086567  | 0.385277459 | FES            |
| 15 | 91429176  | rs7497304   | 0.325763994 | 0.549389534 | -0.057250091 | -0.06333245  | 0.013323907  | 0.32278663  | FES            |
| 15 | 91441673  | rs2677738   | 0.352598639 | 0.000976581 | 0.050676512  | 0.051132705  | -0.000986981 | 0.907792248 | No gene listed |
| 16 | 75313485  | rs4888372   | 0.410807383 | 0.495330339 | 0.03632925   | 0.037101017  | -0.001737951 | 0.911276135 | LOC105371345   |
| 16 | 75388731  | rs8050059   | 0.404542532 | 0.204580477 | 0.036151007  | 0.038516608  | -0.005087854 | 0.691716479 | CFDP1          |
| 17 | 43131480  | rs4793172   | 0.370529324 | 0.492327736 | -0.049678283 | -0.050535908 | 0.001936147  | 0.879104107 | DCAKD          |
| 17 | 43136303  | rs55897749  | 0.370970963 | 0.529653667 | -0.048820686 | -0.049413278 | 0.001335532  | 0.919952747 | DCAKD          |
| 17 | 43141634  | rs6503415   | 0.449655262 | 0.178786587 | -0.043405051 | -0.040590219 | -0.006141362 | 0.619062115 | NMT1           |
| 17 | 43165185  | rs2239916   | 0.416180577 | 0.049798073 | -0.050385896 | -0.049695643 | -0.001805233 | 0.955270632 | NMT1           |
| 17 | 43183108  | rs1053739   | 0.347046089 | 0.066199423 | -0.054327277 | -0.054613956 | 0.000643655  | 0.966582331 | NMT1           |
| 17 | 43195981  | rs3744760   | 0.267629995 | 0.394079019 | -0.060974203 | -0.063036348 | 0.004760947  | 0.714952664 | PLCD3          |
| 17 | 43208121  | rs12946454  | 0.268051966 | 0.676994002 | -0.051964067 | -0.052029852 | 0.000122154  | 0.991671179 | ACBD4          |
| 17 | 43216281  | rs4986172   | 0.338903231 | 0.325170223 | -0.043486897 | -0.043164541 | -0.000534643 | 1           | ACBD4          |
| 17 | 43226887  | rs12051846  | 0.253132575 | 0.564509061 | -0.048390214 | -0.049124204 | 0.001657487  | 0.910065066 | HEXIM1         |
| 17 | 43227214  | rs1044977   | 0.253416186 | 0.757271482 | -0.047581866 | -0.048390113 | 0.001818102  | 0.910515876 | HEXIM1         |
| 17 | 46666483  | rs117470167 | 0.04120212  | 0.334208144 | 0.092335995  | 0.129496986  | -0.082421782 | 0.007407771 | HOXB3          |
| 19 | 7252756   | rs4247374   | 0.142088459 | 0.759310819 | -0.062427572 | 0.052641939  | 0.021355071  | 0.218319986 | INSR           |
| 19 | 7253184   | rs34328549  | 0.122118871 | 0.269521271 | 0.072815706  | 0.064540739  | 0.018157112  | 0.332728589 | INSR           |
| 19 | 11526765  | rs167479    | 0.472352928 | 0.470953034 | 0.049132762  | 0.052391484  | -0.007125653 | 0.544344087 | RGL3           |
| 20 | 10969030  | rs1327235   | 0.476736403 | 0.266674151 | -0.042641897 | -0.042661222 | -7.04E-05    | 1           | No gene listed |
| 20 | 57698020  | rs1465537   | 0.129338604 | 0.015234315 | -0.058138596 | -0.054463762 | -0.008087774 | 0.630093411 | No gene listed |
| 20 | 57702611  | rs236720    | 0.120903376 | 0.02339369  | -0.064642505 | -0.066751446 | 0.004661922  | 0.806647882 | No gene listed |
| 20 | 57758720  | rs16982520  | 0.120375067 | 0.021209887 | -0.07362753  | -0.076843224 | 0.007223546  | 0.694054742 | ZNF831         |
